# Supplementary material for: Inflammatory cytokine production in tumor cells upon chemotherapy drug exposure or upon selection for drug resistance
Source: PubMed Central journal article supplement (PMC5600395; doi:10.1371/journal.pone.0183662), 2017-09-15
Supplement: pone.0183662.s002.pdf [file pone.0183662.s002.pdf]

**RAW DATA FILES FOR**

**EDWARDSON ET AL.**

**Inflammatory Cytokine Production in Tumor Cells Upon Chemotherapy Drug  
Exposure or Upon Selection for Drug Resistance**

***PONE-D-17-07769***

**FIGURE 1**

**Panel A**

|     | 2.5 nM Docetaxel |          |          |                  |          |          |
|-----|------------------|----------|----------|------------------|----------|----------|
|     | NT               |          |          | 2.5 nM Docetaxel |          |          |
|     | A:Y1             | A:Y2     | A:Y3     | B:Y1             | B:Y2     | B:Y3     |
| 24h | 0.113538         | 0.145884 | 0.112556 | 0.087251         | 0.128359 | 0.1081   |
| 48h | 0.115496         | 0.166232 | 0.130045 | 1.109651         | 1.248917 | 1.182244 |
| 72h | 0.285243         | 0.229331 | 0.226879 | 2.522443         | 2.076122 | 2.470708 |
| 96h | 0.214771         | 0.24559  | 0.225553 | 3.29204          | 3.337343 | 2.953104 |

**Panel B**

|     | 2.5 nM Docetaxel |          |          |                  |          |          |
|-----|------------------|----------|----------|------------------|----------|----------|
|     | NT               |          |          | 2.5 nM Docetaxel |          |          |
|     | A:Y1             | A:Y2     | A:Y3     | B:Y1             | B:Y2     | B:Y3     |
| 24h | 0.213056         | 0.223397 | 0.212101 | 0.243376         | 0.247883 | 0.217154 |
| 48h | 0.417918         | 0.511684 | 0.454801 | 1.75034          | 1.639714 | 2.0478   |
| 72h | 0.852225         | 0.908543 | 0.869977 | 5.074019         | 5.390326 | 5.496852 |
| 96h | 2.110896         | 1.988949 | 2.038824 | 9.660055         | 10.91504 | 10.77318 |

**Panel C**

| NT      | nM Docetaxel |          |          |          |
|---------|--------------|----------|----------|----------|
|         | 1.25         | 2.5      | 5        | 10       |
| 0.126   | 2.323496     | 1.885323 | 1.758744 | 0.544212 |
| 0.17082 | 2.051868     | 1.512402 | 1.846681 | 0.572855 |
| 0.15887 | 2.219437     | 1.584118 | 1.868666 | 0.598044 |
| 0.05147 | 1.663898     | 1.81736  | 0.705269 | 0.574956 |
| 0.16297 | 1.677798     | 1.968242 | 0.794356 | 0.616025 |
| 0.07091 | 1.718234     | 2.142616 | 0.748391 | 0.517461 |
| 0.05592 |              | 2.356228 |          |          |
| 0.05307 |              | 2.550179 |          |          |
| 0.09209 |              | 2.46444  |          |          |
| 0.1161  |              | 2.729738 |          |          |
| 0.10425 |              | 2.785622 |          |          |
| 0.08056 |              | 2.815714 |          |          |
|         |              | 2.685298 |          |          |
|         |              | 2.650424 |          |          |
|         |              | 2.77404  |          |          |
|         |              | 1.31924  |          |          |
|         |              | 1.425386 |          |          |
|         |              | 1.258585 |          |          |
|         |              | 0.750602 |          |          |
|         |              | 0.636875 |          |          |
|         |              | 0.761817 |          |          |

**Panel D**

| NT      | nM Docetaxel |          |          |          |
|---------|--------------|----------|----------|----------|
|         | 1.25         | 2.5      | 5        | 10       |
| 0.60948 | 5.95069      | 18.94217 | 27.3777  | 11.94902 |
| 0.6385  | 5.624236     | 18.0682  | 27.50985 | 10.76    |
| 0.55228 | 3.105399     | 4.438651 | 24.2262  | 6.380013 |
| 0.63064 | 3.20095      | 4.295962 | 27.1801  |          |
| 0.59624 | 3.017705     | 4.60045  | 27.3246  |          |
| 0.41599 | 5.748972     | 18.74869 |          |          |
| 0.44502 | 5.443101     | 17.88706 |          |          |
| 0.82027 |              |          |          |          |
| 0.67252 |              |          |          |          |

**FIGURE 2**

| Panel A  |    | Docetaxel nM |            |          |          | Paclitaxel nM |            |          |          |
|----------|----|--------------|------------|----------|----------|---------------|------------|----------|----------|
|          |    | 1.25<br>1.25 | 2.5<br>2.5 | 5<br>5   | 10<br>10 | 1.25<br>1.25  | 2.5<br>2.5 | 5<br>5   | 10<br>10 |
| 0.126    | NT | 2.323496     | 1.885323   | 1.758744 | 0.544212 | 0.663852      | 1.157381   | 2.257469 | 0.427307 |
| 0.170823 | NT | 2.051868     | 1.512402   | 1.846681 | 0.572855 | 0.627732      | 1.084831   | 2.034524 | 0.421732 |
| 0.15887  |    | 2.219437     | 1.584118   | 1.868666 | 0.598044 | 0.635205      | 1.126555   | 2.347768 | 0.385992 |
| 0.051466 |    | 1.663898     | 1.81736    | 0.705269 | 0.574956 |               |            | 0.732527 |          |
| 0.162974 |    | 1.677798     | 1.968242   | 0.794356 | 0.616025 |               |            | 0.780562 |          |
| 0.070908 |    | 1.718234     | 2.142616   | 0.748391 | 0.517461 |               |            | 0.638459 |          |
| 0.055916 |    |              | 2.356228   |          |          |               |            |          |          |
| 0.053073 |    |              | 2.550179   |          |          |               |            |          |          |
| 0.092088 |    |              | 2.46444    |          |          |               |            |          |          |
| 0.116097 |    |              | 2.729738   |          |          |               |            |          |          |
| 0.10425  |    |              | 2.785622   |          |          |               |            |          |          |
| 0.080557 |    |              | 2.815714   |          |          |               |            |          |          |
|          |    |              | 2.685298   |          |          |               |            |          |          |
|          |    |              | 2.650424   |          |          |               |            |          |          |
|          |    |              | 2.77404    |          |          |               |            |          |          |
|          |    |              | 1.31924    |          |          |               |            |          |          |
|          |    |              | 1.425386   |          |          |               |            |          |          |
|          |    |              | 1.258585   |          |          |               |            |          |          |
|          |    |              | 0.750602   |          |          |               |            |          |          |
|          |    |              | 0.636875   |          |          |               |            |          |          |
|          |    |              | 0.761817   |          |          |               |            |          |          |

| Panel B  |    | Docetaxel nM |          |          |          | Paclitaxel nM |          |          |          |
|----------|----|--------------|----------|----------|----------|---------------|----------|----------|----------|
|          |    | 1.25         | 2.5      | 5        | 10       | 1.25          | 2.5      | 5        | 10       |
| 0.634342 | NT | 30.28751     | 21.74215 | 19.8425  | 13.47882 | 2.322385      | 12.80064 | 21.41489 | 24.04128 |
| 0.614823 |    | 30.7121      | 22.27552 | 19.80046 | 13.269   | 2.557268      | 12.23623 | 21.71081 | 24.55925 |
| 0.460903 |    | 26.52423     | 30.5171  | 19.6332  | 13.46102 | 2.487504      | 12.75318 | 24.27309 | 15.91713 |
| 0.480917 |    |              | 30.74212 |          |          |               |          |          |          |
| 0.455471 |    |              | 27.94868 |          |          |               |          |          |          |
| 0.143505 |    |              |          |          |          |               |          |          |          |
| 0.212285 |    |              |          |          |          |               |          |          |          |
| 0.229268 |    |              |          |          |          |               |          |          |          |

| Panel C  |    | Docetaxel nM |          |          |          | Paclitaxel nM |          |          |          |
|----------|----|--------------|----------|----------|----------|---------------|----------|----------|----------|
|          |    | 1.25         | 2.5      | 5        | 10       | 1.25          | 2.5      | 5        | 10       |
| 0.609478 | NT | 5.95069      | 18.94217 | 27.3777  | 11.94902 | 0.869447      | 1.62692  | 6.797906 | 7.931286 |
| 0.6385   |    | 5.624236     | 18.0682  | 27.50985 | 10.76    | 0.931198      | 1.887095 | 6.418964 | 8.447143 |
| 0.552283 |    | 3.105399     | 4.438651 | 24.2262  | 6.380013 | 0.944498      | 1.632256 | 18.86743 | 9.182238 |
| 0.630635 |    | 3.20095      | 4.295962 | 27.1801  |          |               |          | 12.73777 | 3.672531 |

|          |          |          |         |  |  |          |          |
|----------|----------|----------|---------|--|--|----------|----------|
| 0.596237 | 3.017705 | 4.60045  | 27.3246 |  |  | 12.99656 | 3.927273 |
| 0.415993 | 5.748972 | 18.74869 |         |  |  | 9.048648 | 4.300045 |
| 0.445015 | 5.443101 | 17.88706 |         |  |  | 6.041207 |          |
| 0.820269 |          |          |         |  |  | 6.178767 |          |
| 0.672519 |          |          |         |  |  |          |          |
| 0.578824 |          |          |         |  |  |          |          |
| 0.515356 |          |          |         |  |  |          |          |
| 0.575777 |          |          |         |  |  |          |          |

**FIGURE 3**

**Panel A**

| TNF-alpha concentration in medium of MCF-7 |          |           |          |                  |          |          |                 |          |          |
|--------------------------------------------|----------|-----------|----------|------------------|----------|----------|-----------------|----------|----------|
|                                            | NT       |           |          | 2.5 nM Docetaxel |          |          | 15 nM Docetaxel |          |          |
|                                            | A:Y1     | A:Y2      | A:Y3     | B:Y1             | B:Y2     | B:Y3     | C:Y1            | C:Y2     | C:Y3     |
| 48 h                                       | 0.322246 | 0.1047144 | 0.072677 | 0.8255585        | 0.925993 | 1.004345 | 0.363112        | 0.429361 | 0.320221 |
| 72 h                                       | 0.222    | 0.2788887 | 0.31145  | 1.982784         | 2.247354 | 2.262005 | 0.408591        | 0.697569 | 0.568248 |

**Panel B**

| % Trypan-stained MCF-7 |              |          |          |                  |          |      |                 |          |          |
|------------------------|--------------|----------|----------|------------------|----------|------|-----------------|----------|----------|
|                        | No Treatment |          |          | 2.5 nM Docetaxel |          |      | 15 nM Docetaxel |          |          |
|                        | A:Y1         | A:Y2     | A:Y3     | B:Y1             | B:Y2     | B:Y3 | C:Y1            | C:Y2     | C:Y3     |
| 48 h                   | 4.910331     | 5.574913 | 4.225352 | 8                | 6.410256 | 12.8 | 12.90323        | 16.66667 | 11.5942  |
| 72 h                   | 5.7502       | 4.892214 | 4.190337 | 5.263158         | 8.333333 | 8.75 | 12.5            | 19.44444 | 9.259259 |

**Panel C**

|          | 2.5 nM Docetaxel |           | 2.5 nM Docetaxel |
|----------|------------------|-----------|------------------|
| NT       |                  | NT        |                  |
| 0.116097 | 0.750602         | 0.0231595 | 0.212725         |
| 0.10425  | 0.636875         | 0.014296  | 0.152109         |
| 0.080557 | 0.761817         | 0.1222308 | 0.077198         |
| media    |                  | lysate    |                  |

**Panel D**

|       | 2.5 nM Docetaxel |
|-------|------------------|
| NT    |                  |
| 0.764 | 2.81             |
| 0.558 | 7.95             |
| 0.691 | 16.8             |
| 0.817 | 4.52             |
|       | 20.6             |

**FIGURE 4**

**Panel A**

| NT       | NT | Docetaxel | Docetaxel | LPS      | LPS |
|----------|----|-----------|-----------|----------|-----|
| 0.126    |    | 1.885323  |           | 6.704221 |     |
| 0.170823 |    | 1.512402  |           | 6.624016 |     |
| 0.15887  |    | 1.584118  |           | 6.58226  |     |
| 0.051466 |    | 1.81736   |           |          |     |
| 0.162974 |    | 1.968242  |           |          |     |
| 0.070908 |    | 2.142616  |           |          |     |
| 0.055916 |    | 2.356228  |           |          |     |
| 0.053073 |    | 2.550179  |           |          |     |
| 0.092088 |    | 2.46444   |           |          |     |
| 0.116097 |    | 2.685298  |           |          |     |
| 0.10425  |    | 2.650424  |           |          |     |
| 0.080557 |    | 2.77404   |           |          |     |
|          |    | 1.31924   |           |          |     |
|          |    | 1.425386  |           |          |     |
|          |    | 1.258585  |           |          |     |
|          |    | 0.7506022 |           |          |     |
|          |    | 0.6368746 |           |          |     |
|          |    | 0.761817  |           |          |     |

**Panel B**

| NT       | NT | Docetaxel | Docetaxel | LPS       | LPS |
|----------|----|-----------|-----------|-----------|-----|
| 0.609477 |    | 18.94217  |           | 0.7618468 |     |
| 0.6385   |    | 18.0682   |           | 0.7981253 |     |
| 0.552283 |    | 4.438651  |           | 0.5199906 |     |
| 0.630635 |    | 4.60045   |           | 0.5562691 |     |
| 0.596237 |    | 18.74869  |           |           |     |
| 0.415993 |    | 17.88706  |           |           |     |
| 0.445015 |    |           |           |           |     |

**Panel D**

|          |    | nM Docetaxel |     |          |   |          |    |          |     |
|----------|----|--------------|-----|----------|---|----------|----|----------|-----|
| NT       | NT | 2.5          | 2.5 | 5        | 5 | 10       | 10 | LPS      | LPS |
| 8.992932 |    | 8.419748     |     | 9.239824 |   | 9.014973 |    | 8.643001 |     |
| 9.931528 |    | 8.985053     |     | 9.43871  |   | 8.690874 |    | 9.504001 |     |
| 8.241346 |    | 9.170523     |     | 9.694858 |   | 9.086047 |    | 7.956    |     |
| 9.089897 |    | 9.525413     |     | 8.563878 |   |          |    |          |     |
| 8.990008 |    | 10.46637     |     |          |   |          |    |          |     |
| 9.085901 |    | 10.90338     |     |          |   |          |    |          |     |

| Panel C  |    | nM Docetaxel |     |          | LPS<br>LPS |          |    |          |
|----------|----|--------------|-----|----------|------------|----------|----|----------|
| NT       | NT | 2.5          | 2.5 | 5        |            | 5        | 10 | 10       |
| 9.273304 |    | 11.34115     |     | 10.27908 |            | 11.20095 |    | 78.26811 |
| 8.823603 |    | 10.98123     |     | 10.33914 |            | 11.24546 |    | 81.12142 |
| 9.542653 |    | 13.53856     |     | 11.57783 |            | 11.13399 |    | 76.94978 |
| 9.36296  |    | 12.52252     |     |          |            |          |    |          |
| 9.348104 |    | 11.62492     |     |          |            |          |    |          |
| 9.10885  |    | 11.60303     |     |          |            |          |    |          |

| Panel E   |    | nM Docetaxel |     |          | LPS<br>LPS |          |    |          |
|-----------|----|--------------|-----|----------|------------|----------|----|----------|
| NT        | NT | 2.5          | 2.5 | 5        |            | 5        | 10 | 10       |
| 0.2108705 |    | 0.283452     |     | 0.283452 |            | 0.260593 |    | 1.651347 |
| 0.2896642 |    | 0.384116     |     | 0.336985 |            | 0.269736 |    | 1.771146 |
| 0.1890563 |    | 0.302798     |     | 0.330475 |            | 0.208729 |    | 1.433388 |

| Panel F   |  | nM Docetaxel |          |          | LPS    |
|-----------|--|--------------|----------|----------|--------|
| NT        |  | 2.5          | 5        | 10       |        |
| 0.6930309 |  | 0.735699     | 0.668125 | 0.472247 | 0.4792 |
| 0.5355238 |  | 0.71197      | 0.592149 | 0.428047 | 0.6279 |
| 0.5260399 |  | 0.645223     | 0.523449 | 0.423068 | 0.618  |
|           |  |              | 0.583426 |          |        |

## FIGURE 5

| Panel A                                 |          |          |          |                 |              |
|-----------------------------------------|----------|----------|----------|-----------------|--------------|
| TNF-alpha concentration in MB-231 media |          |          |          |                 |              |
| NT                                      | TXT      | LPS      | LPS-RS   | TXT +<br>LPS-RS | LPS + LPS-RS |
| 0.598467                                | 17.03487 | 3.866861 | 0.900544 | 24.47375        | 0.9139853    |
| 0.657573                                | 15.71972 | 3.941303 | 0.771132 | 25.83559        | 0.8139535    |
| 0.732791                                | 16.81154 | 6.793716 | 0.831703 | 25.84369        | 0.6323282    |

| Panel B                                                |          |          |          |                  |               |
|--------------------------------------------------------|----------|----------|----------|------------------|---------------|
| TNF-alpha levels relative to untreated in MB-231 media |          |          |          |                  |               |
| NT                                                     | TXT      | LPS      | TAK-242  | TXT +<br>TAK-242 | LPS + TAK-242 |
| 1.045333                                               | 18.52874 | 5.290668 | 0.877241 | 16.49361         | 1.824         |
| 0.954667                                               | 17.52828 | 5.535634 | 0.772414 | 16.99862         | 1.931034      |
| 1                                                      | 8.907176 | 3.833853 | 0.950078 | 8.524961         | 1.121685      |



**FIGURE 6**

**Panel A**

| <b>NT</b> | <b>TXT</b> | <b>Marimastat</b> | <b>Marimastat +<br/>TXT</b> | <b>LPS</b> | <b>Marimastat<br/>+ LPS</b> |
|-----------|------------|-------------------|-----------------------------|------------|-----------------------------|
| 0.065389  | 2.380151   | 0.1052448         | 2.545491                    | 7.948003   | 4.152964                    |
| 0.074263  | 2.345277   | 0.0714606         | 2.920698                    | 9.031589   | 4.778049                    |
| 0.08267   | 2.452545   | 0.0616523         | 2.670819                    | 7.099973   | 5.155903                    |
| 0.119412  | 2.300062   | 0.1424211         | 1.791307                    | 10.90422   | 5.053028                    |
| 0.298297  | 2.239895   | 0.2056347         | 1.669449                    | 10.63969   | 4.492737                    |
| 0.255647  |            |                   |                             |            |                             |

**Panel B**

| <b>NT</b> | <b>TXT</b> | <b>Marimastat</b> | <b>Marimastat +<br/>TXT</b> |
|-----------|------------|-------------------|-----------------------------|
| 0.852195  | 5.07384    | 0.1638837         | 3.048237                    |
| 0.775214  | 5.390136   | 0.3380102         | 3.107235                    |
| 0.843321  | 5.49666    | 0.1704391         | 3.089208                    |

## FIGURE 7

Panel A

| <b>MCF-7</b><br>cc10 | <b>TXT8</b> | <b>TXT9</b> | <b>TXT10</b> | <b>TXT11</b> | <b>TXT12</b> |
|----------------------|-------------|-------------|--------------|--------------|--------------|
| 2.181673             | 0.053946    | 1.830803    | 17.73766     | 21.4299      | 55.48964     |
| -0.238392            | 0.254337    | 5.946181    | 13.5049      | 13.98092     | 62.04313     |
| 2.002319             | -0.092437   | 5.103512    | 22.41457     | 42.85769     | 50.03312     |
| -1.02066             |             |             |              |              |              |
| 0.0936               |             |             |              |              |              |
| 0.3997               |             |             |              |              |              |
| -1.056726            |             |             |              |              |              |
| -0.31453             |             |             |              |              |              |

Panel B

| <b>NT</b> | <b>Tar</b> | <b>H<sup>3</sup> -TXT</b> | <b>H<sup>3</sup> -TXT +<br/>Tar</b> | <b>NT</b>  | <b>Tar</b> | <b>H<sup>3</sup> -TXT</b> | <b>H<sup>3</sup> -TXT +<br/>Tar</b> |
|-----------|------------|---------------------------|-------------------------------------|------------|------------|---------------------------|-------------------------------------|
| 0.0445    | 0.008      | 14.9905                   | 16.0905                             | 0.124      | 0.0385     | 5.9875                    | 12.2365                             |
| 0.057     | 0.05       | 15.571                    | 17.8775                             | 0.06500001 | 0.047      | 6.762                     | 13.304                              |
| 0.049     | 0.037      | 16.094                    | 15.9285                             | 0.13       | 0.0572     | 6.5325                    | 14.378                              |

## FIGURE 8

note: data points for the clonogenic curves are the 'Mean', which in this case refers to the mean number of colonies counted and then divided by the mean of the control cells (cells that received docetaxel at log concentration of -15)

Panel A

| log [docetaxel] | MCF-7TXT10 |          | MCF-7TXT10 + Tar (100nM) |          | MCF-7cc10 |           | MCF-7cc10 + Tar (100nM) |           |
|-----------------|------------|----------|--------------------------|----------|-----------|-----------|-------------------------|-----------|
|                 | Mean       | SEM      | Mean                     | SEM      | Mean      | SEM       | Mean                    | SEM       |
| -5              | 0.017964   | 0.524435 | 0.104651                 | 0.184032 |           |           |                         |           |
| -5.48           | 0.035928   | 0.305309 | 0.046512                 | 0.288288 |           |           |                         |           |
| -5.95           | 0.125749   | 0.190032 | 0.052326                 | 0.246584 |           |           |                         |           |
| -6.43           | 0.053892   | 0.336772 | 0.034884                 | 0.46442  |           |           |                         |           |
| -6.91           | 0.149701   | 0.168348 | 0.069767                 | 0.184032 |           |           |                         |           |
| -7.39           | 0.137725   | 0.20326  | 0.052326                 | 0.296209 |           |           |                         |           |
| -7.86           | 0.317365   | 0.137738 | 0.034884                 | 0.307366 |           |           |                         |           |
| -8.34           | 0.754491   | 0.096862 | 0.104651                 | 0.246584 |           |           |                         |           |
| -8.82           | 1.023952   | 0.078701 | 0.215116                 | 0.14224  |           |           |                         |           |
| -9.29           | 0.994012   | 0.08249  | 0.47093                  | 0.090894 |           |           |                         |           |
| -9.77           | 1.185629   | 0.065848 | 0.825581                 | 0.087512 |           |           |                         |           |
| -15             | 1          | 0.067891 | 1                        | 0.084434 |           |           |                         |           |
| -6.48           |            |          |                          |          | 0.016722  | 0.358917* | 0.0301                  | 0.292369* |
| -6.95           |            |          |                          |          | 0.046823  | 0.181903* | 0.026756                | 0.33903*  |
| -7.43           |            |          |                          |          | 0.006689  | 0.675347* | 0.036789                | 0.285824* |
| -7.91           |            |          |                          |          | 0.043478  | 0.214933  | 0.023411                | 0.494315* |
| -8.39           |            |          |                          |          | 0.133779  | 0.093922  | 0.153846                | 0.102043  |
| -8.86           |            |          |                          |          | 0.123746  | 0.134968  | 0.120401                | 0.134684  |
| -9.34           |            |          |                          |          | 0.287625  | 0.062125  | 0.297659                | 0.060287  |
| -9.82           |            |          |                          |          | 0.705686  | 0.064183  | 0.809365                | 0.051013  |
| -10.29          |            |          |                          |          | 0.849498  | 0.085196  | 0.816054                | 0.060819  |
| -10.77          |            |          |                          |          | 0.772575  | 0.074296  | 1.006689                | 0.057571  |
| -11.25          |            |          |                          |          | 0.889632  | 0.066649  | 1.177258                | 0.049192  |
| -15             |            |          |                          |          | 1         | 0.055654  | 1                       | 0.051081  |

Panel B

| Log[docetaxel] | A2780cc12 + TAR |          | A2780dxl12 + TAR |          | A2780cc12 |          | A2780dxl12 |          |
|----------------|-----------------|----------|------------------|----------|-----------|----------|------------|----------|
|                | Mean            | SEM      | Mean             | SEM      | Mean      | SEM      | Mean       | SEM      |
| -5.52          | 0.02551         | 0.239773 | 0.034856         | 0.24777  | 0.012672  | 0.272731 | 0.109137   | 0.246647 |
| -6             | 0.041327        | 0.305563 | 0.044471         | 0.401342 | 0.026399  | 0.236144 | 0.192893   | 0.23255  |
| -6.48          | 0.021429        | 0.387713 | 0.039663         | 0.37755  | 0.017951  | 0.287115 | 0.236041   | 0.1643   |
| -6.95          | 0.018367        | 0.303762 | 0.027644         | 0.40671  | 0.024287  | 0.339229 | 0.332487   | 0.127448 |
| -7.43          | 0.02551         | 0.272484 | 0.030048         | 0.32692  | 0.030623  | 0.40021  | 0.611675   | 0.110323 |
| -7.91          | 0.037755        | 0.234222 | 0.030048         | 0.237924 | 0.030623  | 0.350442 | 0.949239   | 0.113952 |
| -8.39          | 0.036735        | 0.199364 | 0.067308         | 0.181964 | 0.029567  | 0.301179 | 1.032995   | 0.110846 |
| -8.86          | 0.115306        | 0.191799 | 0.126202         | 0.165093 | 0.263992  | 0.090422 | 1.005076   | 0.109116 |

|        |          |          |          |          |          |          |          |          |
|--------|----------|----------|----------|----------|----------|----------|----------|----------|
| -9.34  | 0.404082 | 0.121664 | 0.540865 | 0.079941 | 0.700106 | 0.065401 | 0.875635 | 0.096196 |
| -9.82  | 0.860204 | 0.074396 | 0.84976  | 0.100283 | 1.089757 | 0.066986 | 1.068528 | 0.107529 |
| -10.29 | 1.036735 | 0.106647 | 0.778846 | 0.082996 | 1.208025 | 0.081497 | 1.192893 | 0.092443 |
| -15    | 1        | 0.082246 | 1        | 0.070694 | 1        | 0.057534 | 1        | 0.10704  |

**FIGURE 9****(Panel A)**

| <b>MCF-7</b> |          |           |          |          |          |          |
|--------------|----------|-----------|----------|----------|----------|----------|
| cc10         | TXT7     | TXT8      | TXT9     | TXT10    | TXT11    | TXT12    |
| 0.094824     | 0.029384 | 0.017331  | 0.84226  | 2.528026 | 0.280886 | 0.201999 |
| 0.109765     | 0.025897 | -0.005777 | 0.978918 | 2.634201 | 0.20419  | 0.213653 |
| 0.124905     | 0.027391 | -0.005478 | 0.918557 | 2.645686 | 0.193931 | 0.188254 |

**(Panel C)**

| <b>MCF-7</b> |          |          |          |          |          |          |
|--------------|----------|----------|----------|----------|----------|----------|
| cc10         | TXT7     | TXT8     | TXT9     | TXT10    | TXT11    | TXT12    |
| 11.29996     | 31.93417 | 48.83867 | 81.86462 | 102.7976 | 33.03342 | 15.0359  |
| 9.792383     | 32.62696 | 49.54453 | 74.95169 | 95.19003 | 31.39389 | 14.44706 |
| 11.84771     | 33.56375 | 47.20848 | 79.0748  | 93.64388 | 35.74108 | 14.85664 |

**(Panel E)**

| <b>MCF-7</b> |          |          |          |          |          |          |
|--------------|----------|----------|----------|----------|----------|----------|
| cc10         | TXT7     | TXT8     | TXT9     | TXT10    | TXT11    | TXT12    |
| 0.22707      | 0.470322 | 1.113426 | 6.6816   | 10.8837  | 1.098549 | 0.286578 |
| 0.252909     | 0.304326 | 1.141614 | 6.654978 | 10.62688 | 0.84564  | 0.20097  |
| 0.275094     | 0.267786 | 1.148139 | 6.828804 | 11.18124 | 0.97614  | 0.190008 |

**(Panel B)**

| <b>A2780</b> |          |          |          |
|--------------|----------|----------|----------|
| cc12         | DXL10    | DXL11    | DXL12    |
| 0.341116     | 0.992879 | 3.032887 | 2.299098 |
| 0.407046     | 0.952004 | 3.18545  | 2.295106 |
| 0.372648     | 0.980351 | 3.130243 | 2.517758 |

**(Panel D)**

| <b>A2780</b> |          |          |          |
|--------------|----------|----------|----------|
| cc12         | DXL10    | DXL11    | DXL12    |
| 9.805944     | 10.07681 | 9.295218 | 9.742544 |
| 10.39205     | 10.00777 | 8.305466 | 9.996146 |
| 10.62663     | 9.535435 | 9.543184 | 9.335724 |

**(Panel F)**

| <b>A2780</b> |          |          |          |
|--------------|----------|----------|----------|
| cc12         | DXL10    | DXL11    | DXL12    |
| 0.018275     | 2.616266 | 1.566756 | 0.154197 |
| 0.054826     | 3.018663 | 2.018267 | 0.174757 |
| 0.099943     | 3.125059 | 1.880175 | 0.139977 |

## FIGURE 10

MCF-7TXT10

| NT       | Marimast<br>at | TXT       | Marimast<br>at + TXT | LPS      | Marimast<br>at + LPS |
|----------|----------------|-----------|----------------------|----------|----------------------|
| 0.343812 | 0.243754       | 0.3470631 | 0.295641             | 2.585182 | 1.487322             |
| 0.358251 | 0.243903       | 0.3689741 | 0.297289             | 2.582885 | 1.433416             |
| 0.359813 | 0.185565       | 0.3858823 | 0.305803             | 2.799413 | 1.108661             |
| 0.360292 | 0.215526       |           |                      |          |                      |
| 0.34817  | 0.23348        |           |                      |          |                      |

**FIGURE 11**

**Panel A**

| NT | TXT      | LPS      | NT | TXT      | LPS      |
|----|----------|----------|----|----------|----------|
| 1  | 12.41692 | 33.49213 | 1  | 1.513043 | 9.932932 |
| 1  | 13.33832 | 32.69291 | 1  | 1.514578 | 9.924106 |
| 1  | 12.9274  | 33.44882 | 1  | 1.261722 | 10.75606 |

**Panel B**

| NT | TXT      | LPS      | NT | TXT      | LPS      |
|----|----------|----------|----|----------|----------|
| 1  | 27.50893 | 1.257038 | 1  | 0.895005 | 1.251036 |
| 1  | 30.58163 | 1.590821 | 1  | 1.050763 | 1.289561 |
| 1  | 30.13967 | 1.193984 | 1  | 1.178354 | 1.27794  |

**Immunoblots for Figure 12**  
**RAW DATA**



# TRIF Immunoblot Loading

1. A2780<sub>CC12</sub> Replicate 1
2. A2780<sub>DXL12</sub> Replicate 1
3. A2780<sub>CC12</sub> Replicate 2
4. A2780<sub>DXL12</sub> Replicate 2
5. A2780<sub>CC12</sub> Replicate 3
6. A2780<sub>DXL12</sub> Replicate 3
7. MCF-7<sub>CC10</sub> Replicate 1
8. MCF-7<sub>TXT10</sub> Replicate 1
9. MCF-7<sub>CC10</sub> Replicate 2
10. MCF-7<sub>TXT10</sub> Replicate 2
11. MCF-7<sub>CC10</sub> Replicate 3
12. MCF-7<sub>TXT10</sub> Replicate 3

# TRIF Antibody 1:700

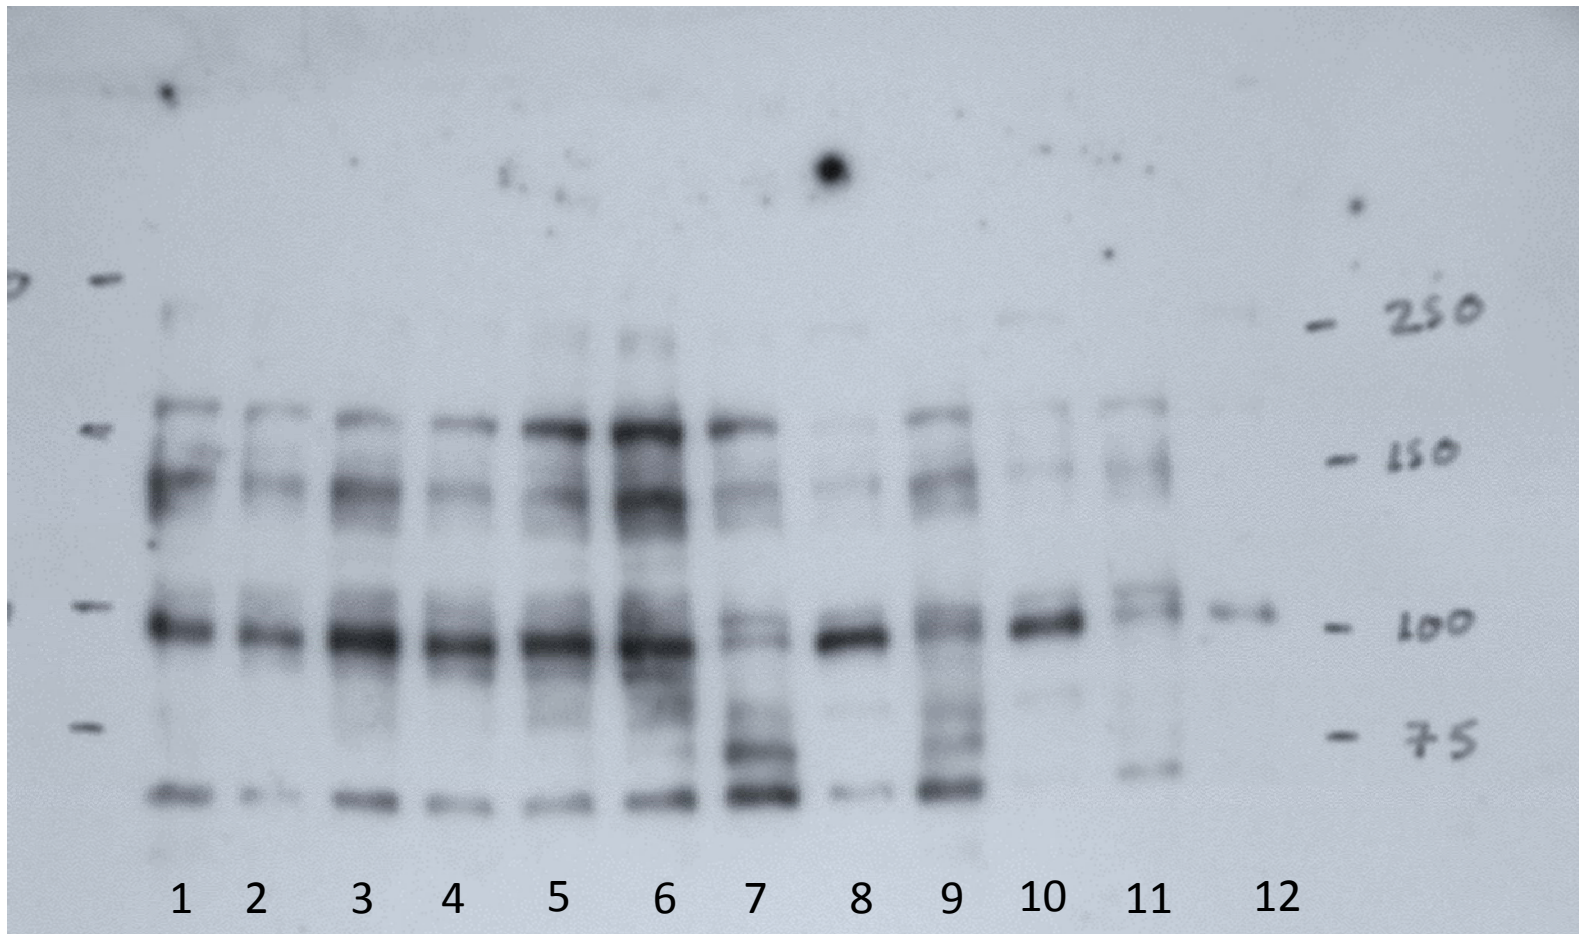

# Gamma Tubulin Antibody 1:10,000 Loading Control for TRIF Immunoblot

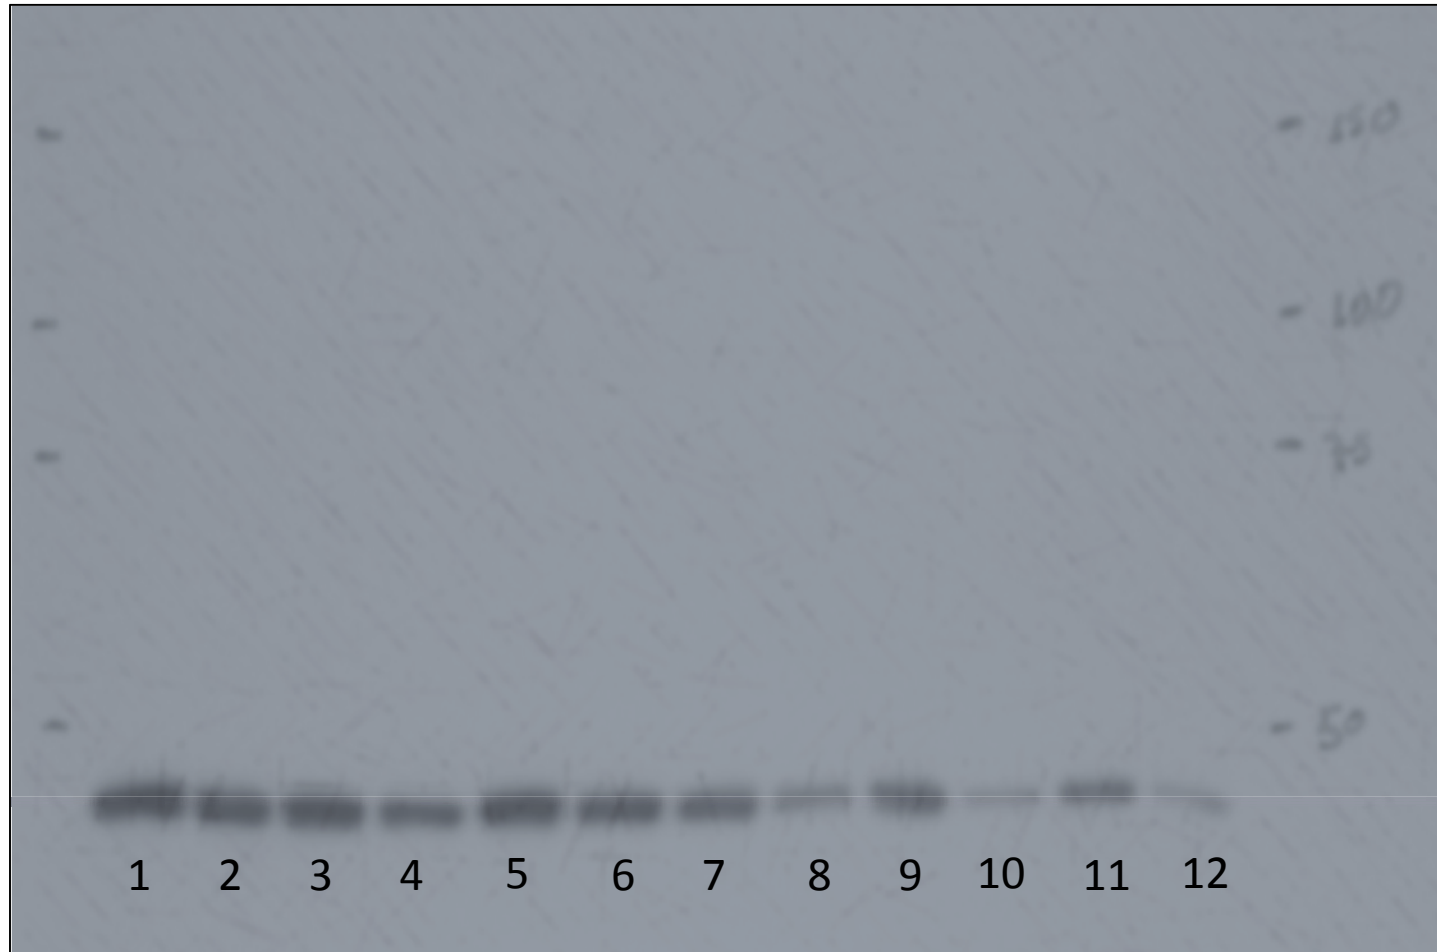

# MyD88 Antibody 1:1000

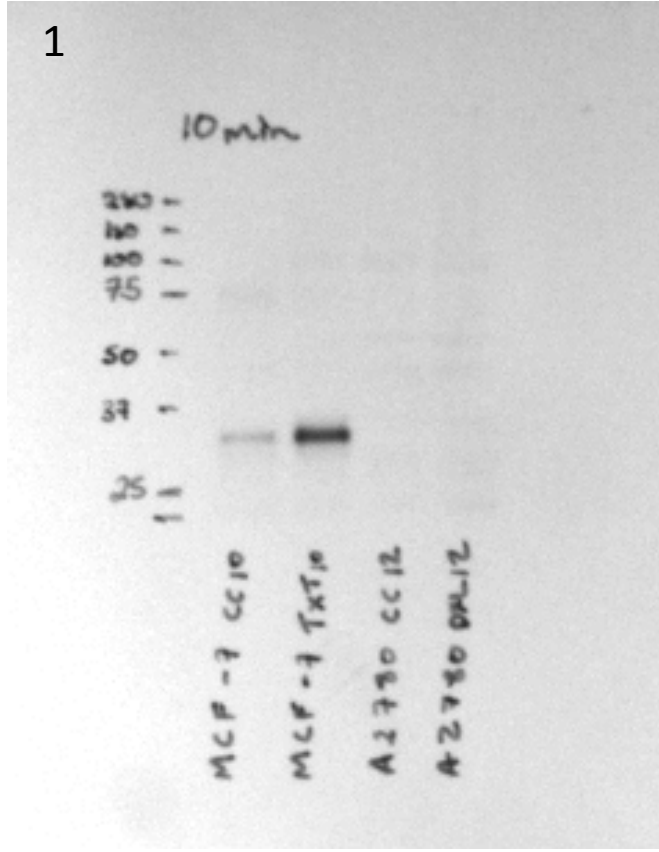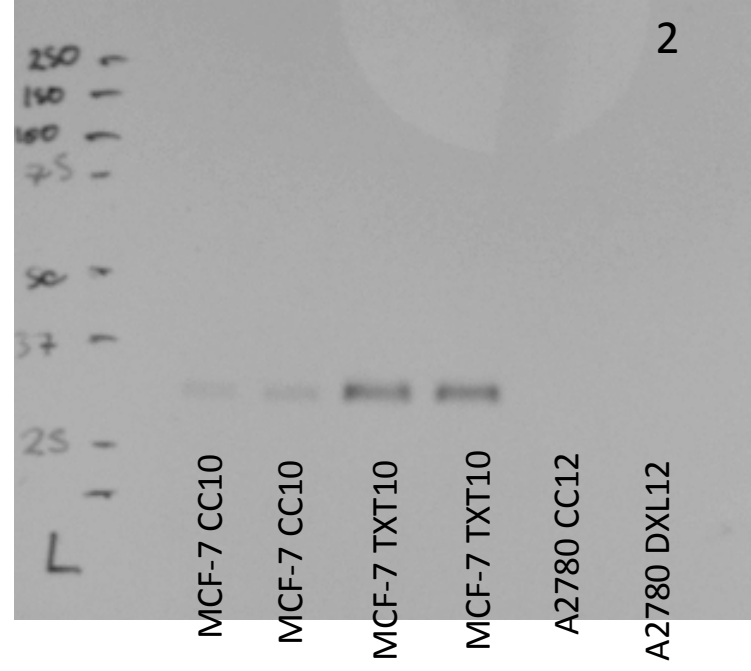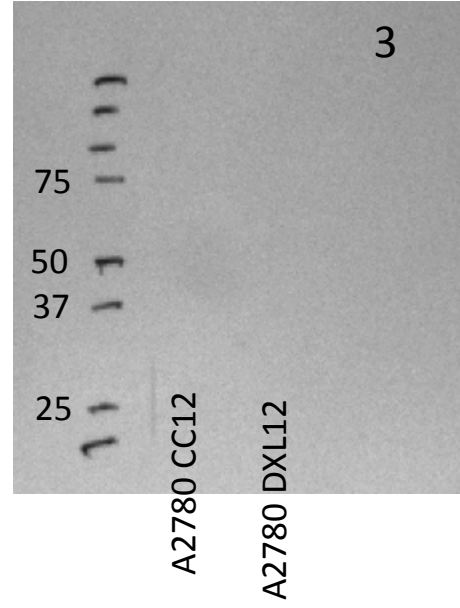

**GAPDH Loading Controls 1:10000  
For MyD88 Immunoblots**

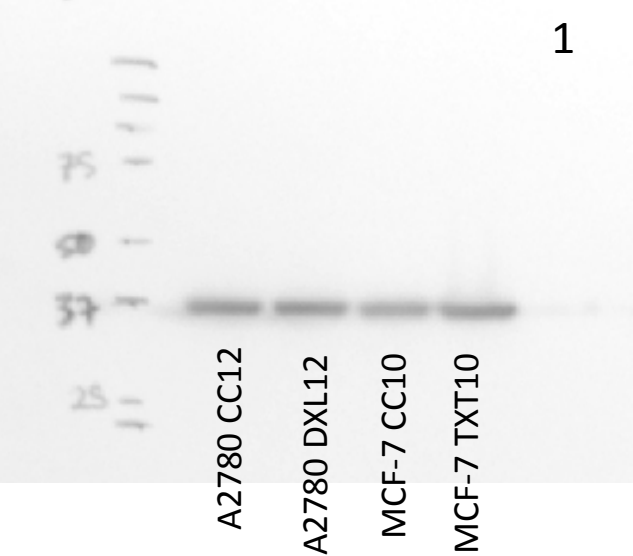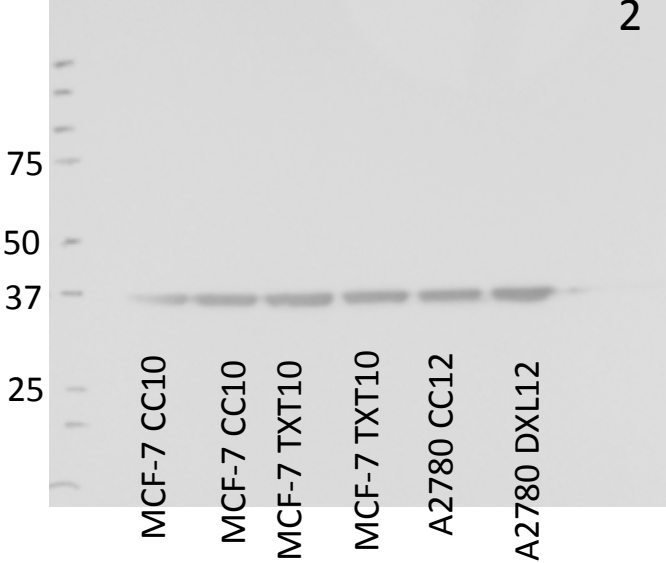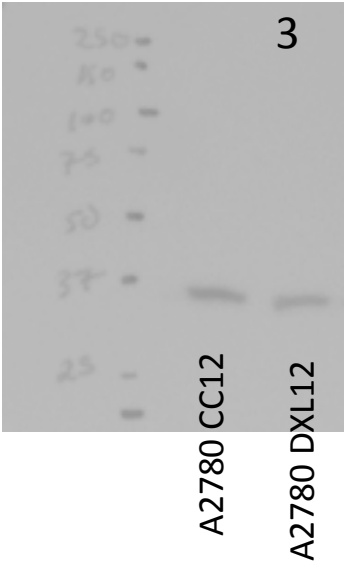

# TLR4 Antibody: 1:250

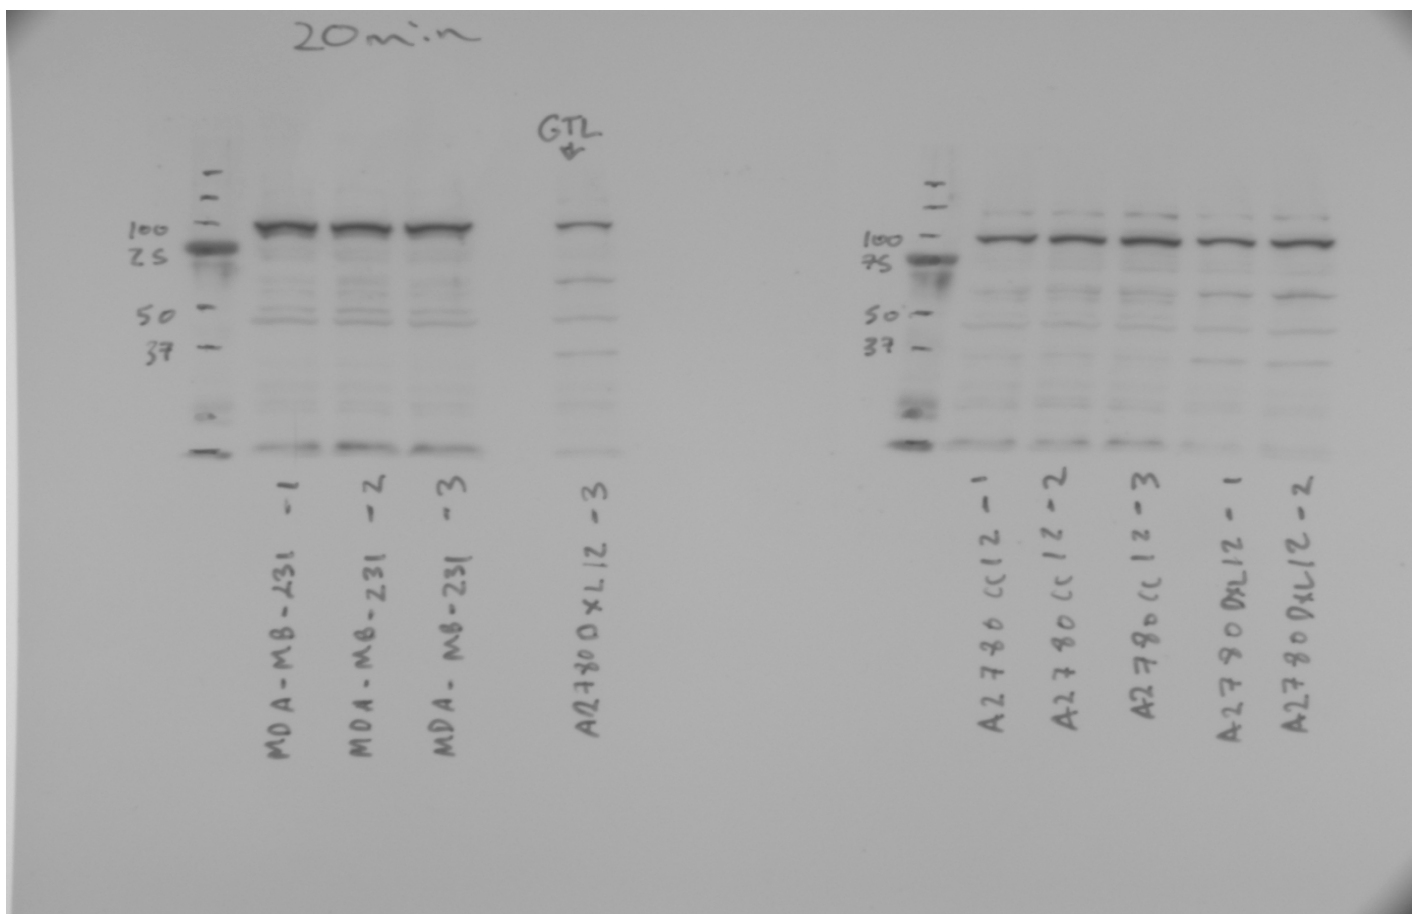

**GAPDH Loading Control 1:10,000  
For TLR4 Immunoblot**

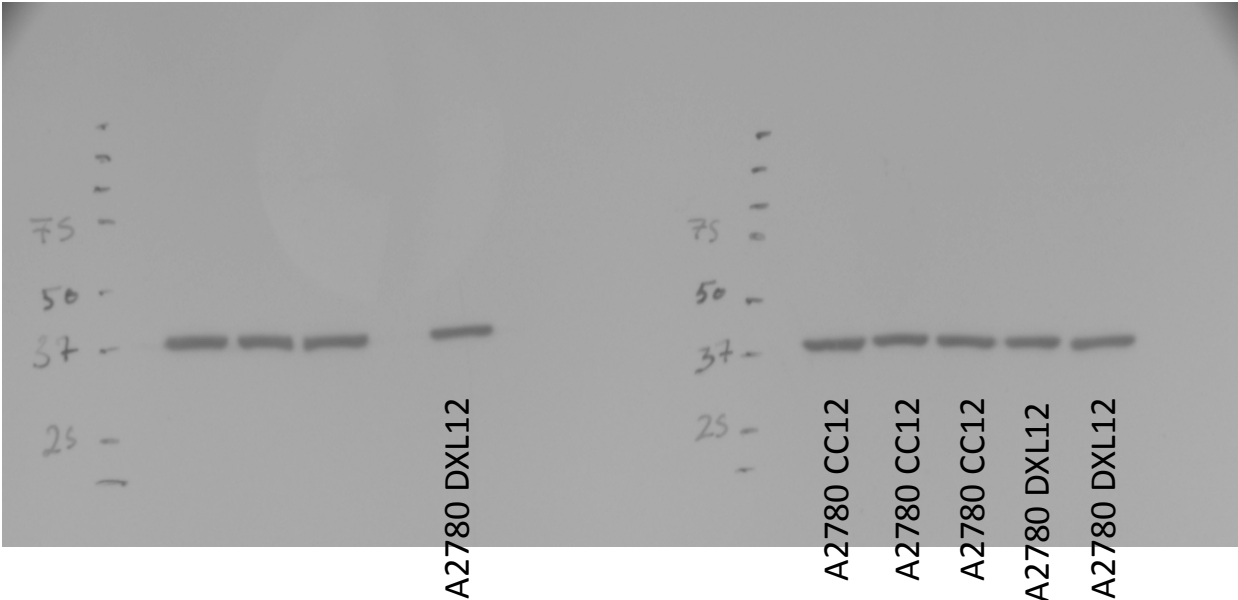

# TLR4 Antibody 1:250

2016.07.27

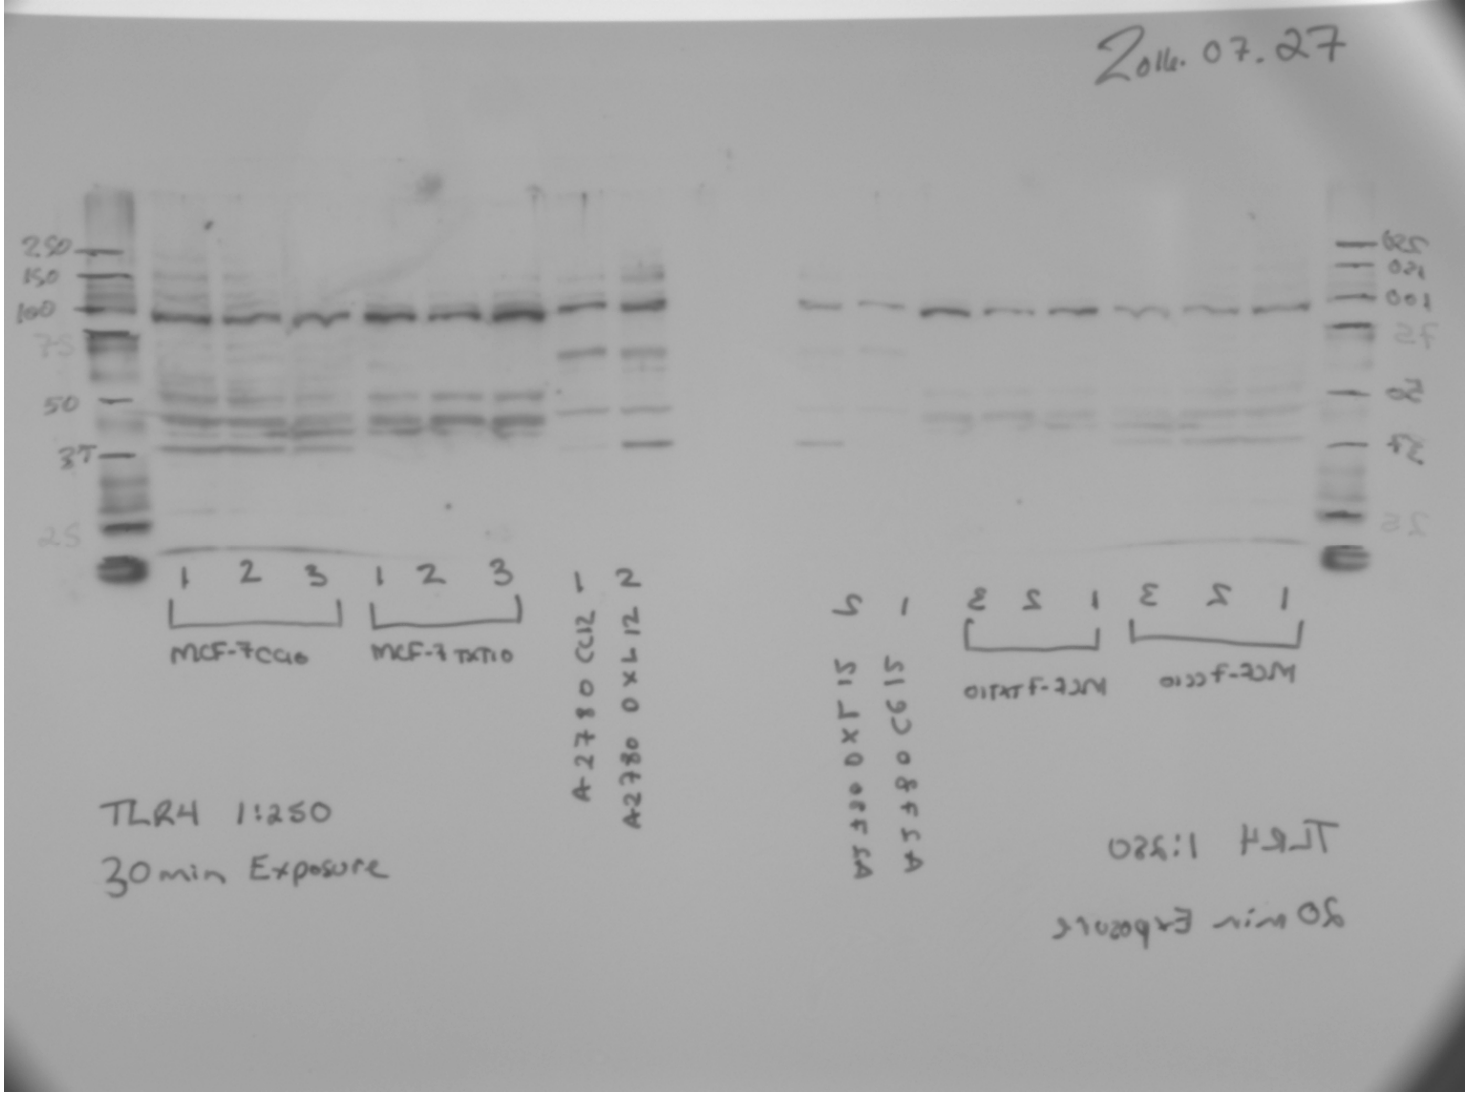

TLR4 1:250  
30 min Exposure

TLR4 1:250  
30 min Exposure



**GAPDH Loading control 1:10,000  
For Prior TLR4 Immunoblot**

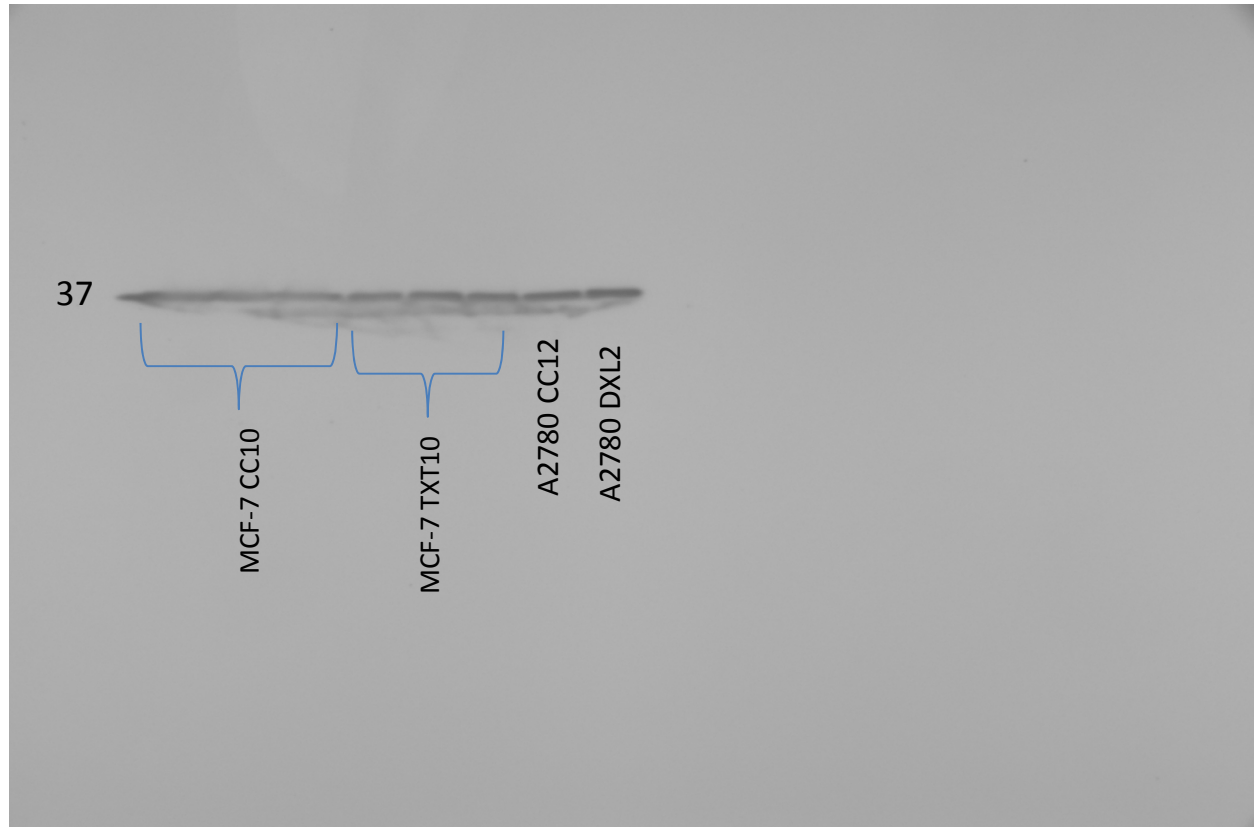

**FIGURE 12****Panel C**

|       | <b>MCF-7</b><br>CC10 |             |             | <b>MCF-7</b><br>TXT10 |             |             |
|-------|----------------------|-------------|-------------|-----------------------|-------------|-------------|
|       | <b>A:Y1</b>          | <b>A:Y2</b> | <b>A:Y3</b> | <b>B:Y1</b>           | <b>B:Y2</b> | <b>B:Y3</b> |
| TLR4  | 1.033333             | 0.884615    | 0.84        | 1.222222              | 0.83871     | 1.28125     |
| MyD88 | 0.230769             | 0.181818    | 0.142857    | 0.8                   | 0.5         | 0.521739    |

**Panel E**

|      | <b>MCF-7</b> | <b>MCF-7</b> |
|------|--------------|--------------|
|      | CC10         | TXT10        |
| TRIF | 0.489796     | 0.848101     |
|      | 0.433962     | 0.833333     |
|      | 0.727273     | 0.764706     |

**Panel D**

|       | <b>A2780</b><br>CC12 |             |             | <b>A2780</b><br>DXL12 |             |             |
|-------|----------------------|-------------|-------------|-----------------------|-------------|-------------|
|       | <b>A:Y1</b>          | <b>A:Y2</b> | <b>A:Y3</b> | <b>B:Y1</b>           | <b>B:Y2</b> | <b>B:Y3</b> |
| TLR4  | 2.25                 | 3.210526    | 3.045455    | 2.4                   | 2.52381     | 1.952381    |
| MyD88 | 0                    | 0           | 0           | 0                     | 0           | 0           |

**Panel F**

|      | <b>A2780</b> | <b>A2780</b> |
|------|--------------|--------------|
|      | CC12         | DXL12        |
| TRIF | 0.897059     | 0.87931      |
|      | 0.805556     | 0.836957     |
|      | 0.669811     | 0.47541      |

**FIGURE 13****Panel A**

| MCF-7cc10 |          |                |                     | MCF-7txt10 |          |                |                     |
|-----------|----------|----------------|---------------------|------------|----------|----------------|---------------------|
| NT        | TXT      | Tariquida<br>r | Tariquidar +<br>TXT | NT         | TXT      | Tariquida<br>r | Tariquidar +<br>TXT |
| 1.020604  | 3.335888 | 0.847628       | 3.307618            | 0.9336385  | 1.436928 | 0.799914       | 1.963387            |
| 1.103977  | 3.612842 | 0.889315       | 2.89794             | 1.050343   | 1.425057 | 0.780892       | 2.031178            |
| 0.875419  | 3.932917 | 0.94873        | 3.48826             | 1.016018   | 1.222826 | 0.834096       | 2.202517            |

**Panel B**

| A2780cc12 |          |                |                     | A2780dxl12 |          |                |                     |
|-----------|----------|----------------|---------------------|------------|----------|----------------|---------------------|
| NT        | TXT      | Tariquida<br>r | Tariquidar +<br>TXT | NT         | TXT      | Tariquida<br>r | Tariquidar +<br>TXT |
| 0.982068  | 13.92257 | 0.985736       | 14.13653            | 0.9713228  | 0.895005 | 0.938714       | 2.00703             |
| 1.005604  | 12.24697 | 1.044422       | 12.16505            | 0.96716    | 1.050763 | 0.820074       | 1.93321             |
| 1.012328  | 12.23688 | 1.146205       | 11.64177            | 1.061517   | 1.178354 | 0.871485       | 2.048104            |

## FIGURE 14

note: data points for the clonogenic curves are the values in the 'Mean' column, which in this case refers to the mean number of colonies counted and then divided by the mean of the control cells (cells that received docetaxel at log concentration of -15)

Panel A

| log<br>[docetaxel] | MCF-7TXT10 |           |    | MCF-7TXT10 + LPS<br>(10ug/ml) |           |    | MCF-7cc10 |           |    | MCF-7cc10 + LPS<br>(10ug/ml) |           |    |
|--------------------|------------|-----------|----|-------------------------------|-----------|----|-----------|-----------|----|------------------------------|-----------|----|
|                    | Mean       | SEM       | N  | Mean                          | SEM       | N  | Mean      | SEM       | N  | Mean                         | SEM       | N  |
| -5                 | 0.049587   | 0.331724* | 12 | 0.028986                      | 0.286971* | 12 |           |           |    |                              |           |    |
| -5.48              | 0.024793   | 0.464867* | 12 | 0.007246                      | 0.676278* | 12 |           |           |    |                              |           |    |
| -5.95              | 0.053719   | 0.220517* | 12 | 0.028986                      | 0.42968*  | 12 |           |           |    |                              |           |    |
| -6.43              | 0.090909   | 0.239423* | 12 | 0.036232                      | 0.360666* | 12 |           |           |    |                              |           |    |
| -6.91              | 0.202479   | 0.127318  | 12 | 0.083333                      | 0.223754  | 12 |           |           |    |                              |           |    |
| -7.39              | 0.454545   | 0.134889  | 12 | 0.155797                      | 0.152996  | 12 |           |           |    |                              |           |    |
| -7.86              | 0.714876   | 0.099956  | 12 | 0.416667                      | 0.10472   | 12 |           |           |    |                              |           |    |
| -8.34              | 1.243802   | 0.08439   | 12 | 0.597826                      | 0.07281   | 12 |           |           |    |                              |           |    |
| -8.82              | 1.057851   | 0.103519  | 12 | 0.702899                      | 0.081027  | 12 |           |           |    |                              |           |    |
| -9.29              | 1.289256   | 0.087881  | 12 | 1.057971                      | 0.088057  | 12 |           |           |    |                              |           |    |
| -9.77              | 1.132231   | 0.07188   | 12 | 1.021739                      | 0.064537  | 12 |           |           |    |                              |           |    |
| -15                | 1          | 0.08922   | 12 | 1                             | 0.074925  | 12 |           |           |    |                              |           |    |
| -6.48              |            |           |    |                               |           |    | 0.029412  | 0.570453* | 12 | 0.015                        | 0.719802* | 12 |
| -6.95              |            |           |    |                               |           |    | 0.022059  | 0.529115* | 12 | 0.015                        | 0.719802* | 12 |
| -7.43              |            |           |    |                               |           |    | 0.051471  | 0.341609* | 12 | 0.02                         | 0.566697* | 12 |
| -7.91              |            |           |    |                               |           |    | 0.095588  | 0.341223* | 12 | 0.045                        | 0.295193* | 12 |
| -8.39              |            |           |    |                               |           |    | 0.154412  | 0.228867  | 12 | 0.025                        | 0.466379* | 12 |
| -8.86              |            |           |    |                               |           |    | 0.323529  | 0.163613  | 12 | 0.155                        | 0.148886  | 12 |
| -9.34              |            |           |    |                               |           |    | 0.448529  | 0.160252  | 12 | 0.185                        | 0.121861  | 12 |
| -9.82              |            |           |    |                               |           |    | 0.698529  | 0.157328  | 12 | 0.385                        | 0.105963  | 12 |
| -10.29             |            |           |    |                               |           |    | 1.117647  | 0.10509   | 12 | 0.625                        | 0.093556  | 12 |
| -10.77             |            |           |    |                               |           |    | 0.698529  | 0.118806  | 12 | 0.86                         | 0.08437   | 12 |
| -11.25             |            |           |    |                               |           |    | 1.147059  | 0.107417  | 12 | 0.96                         | 0.081807  | 12 |
| -15                |            |           |    |                               |           |    | 1         | 0.120291  | 12 | 1                            | 0.076989  | 12 |

Panel B

| log<br>[docetaxel] | A2780 <sub>DXL12</sub> A2780 <sub>DXL12</sub> |            |        | A2780 <sub>DXL12</sub> + LPS A2780 <sub>DXL12</sub> + LPS |            |        | A2780 <sub>CC12</sub> A2780 <sub>CC12</sub> |            |        | A2780 <sub>CC12</sub> + LPS A2780 <sub>CC12</sub> + LPS |            |        |
|--------------------|-----------------------------------------------|------------|--------|-----------------------------------------------------------|------------|--------|---------------------------------------------|------------|--------|---------------------------------------------------------|------------|--------|
|                    | Mean<br>Mean                                  | SEM<br>SEM | N<br>N | Mean<br>Mean                                              | SEM<br>SEM | N<br>N | Mean<br>Mean                                | SEM<br>SEM | N<br>N | Mean<br>Mean                                            | SEM<br>SEM | N<br>N |
| -5                 | 0                                             |            | 12     | 0                                                         |            | 12     |                                             |            |        |                                                         |            |        |
| -5.48              | 0.012821                                      | 0.718312*  | 12     | 0                                                         |            | 12     |                                             |            |        |                                                         |            |        |
| -5.95              | 0                                             |            | 12     | 0                                                         |            | 12     |                                             |            |        |                                                         |            |        |
| -6.43              | 0.012821                                      | 0.718312*  | 12     | 0.03211                                                   | 0.332089*  | 12     |                                             |            |        |                                                         |            |        |
| -6.91              | 0.141026                                      | 0.145281   | 12     | 0.059633                                                  | 0.267      | 12     |                                             |            |        |                                                         |            |        |
| -7.39              | 0.482906                                      | 0.115641   | 12     | 0.422018                                                  | 0.077862   | 12     |                                             |            |        |                                                         |            |        |
| -7.86              | 0.700855                                      | 0.082771   | 12     | 0.490826                                                  | 0.059803   | 12     |                                             |            |        |                                                         |            |        |
| -8.34              | 0.846154                                      | 0.052356   | 12     | 0.724771                                                  | 0.080545   | 12     |                                             |            |        |                                                         |            |        |
| -8.82              | 0.833333                                      | 0.0438     | 12     | 0.825688                                                  | 0.067765   | 12     |                                             |            |        |                                                         |            |        |
| -9.29              | 1.089744                                      | 0.066449   | 12     | 0.830275                                                  | 0.071976   | 12     |                                             |            |        |                                                         |            |        |
| -9.77              | 1.141026                                      | 0.043191   | 12     | 0.912844                                                  | 0.069377   | 12     |                                             |            |        |                                                         |            |        |
| -15                | 1                                             | 0.051324   | 12     | 1                                                         | 0.070973   | 12     |                                             |            |        |                                                         |            |        |
| -5.48              |                                               |            |        |                                                           |            |        | 0                                           |            | 12     | 0                                                       |            | 12     |
| -5.96              |                                               |            |        |                                                           |            |        | 0                                           |            | 12     | 0                                                       |            | 12     |
| -6.44              |                                               |            |        |                                                           |            |        | 0                                           |            | 12     | 0                                                       |            | 12     |
| -6.91              |                                               |            |        |                                                           |            |        | 0                                           |            | 12     | 0                                                       |            | 12     |
| -7.39              |                                               |            |        |                                                           |            |        | 0                                           |            | 12     | 0                                                       |            | 12     |
| -7.87              |                                               |            |        |                                                           |            |        | 0                                           |            | 12     | 0                                                       |            | 12     |
| -8.34              |                                               |            |        |                                                           |            |        | 0                                           |            | 12     | 0                                                       |            | 12     |
| -8.82              |                                               |            |        |                                                           |            |        | 0.442953                                    | 0.061858   | 12     | 0.238095                                                | 0.08237    | 12     |
| -9.3               |                                               |            |        |                                                           |            |        | 0.671141                                    | 0.051374   | 12     | 0.866667                                                | 0.04393    | 12     |
| -9.78              |                                               |            |        |                                                           |            |        | 0.852349                                    | 0.04904    | 12     | 1.257143                                                | 0.065782   | 12     |
| -10.25             |                                               |            |        |                                                           |            |        | 0.885906                                    | 0.07257    | 12     | 1.047619                                                | 0.05004    | 12     |
| -15                |                                               |            |        |                                                           |            |        | 1                                           | 0.055695   | 12     | 1                                                       | 0.066019   | 12     |

## S1 FIGURE

S1

| NT        | TNF- $\alpha$ | NT         |
|-----------|---------------|------------|
| 2.582826  | -0.386574     | 14.03643   |
| -0.683493 | -0.372971     | 16.23155   |
| 1.267765  | 0.111289      | 13.99746   |
| MCF-7cc10 |               | MCF-7txt10 |
